# Supplementary material for: Serum microRNAs in Systemic Sclerosis, Associations with Digital Vasculopathy and Lung Involvement
Source: MDPI journal article supplement (doi:10.3390/ijms231810731), 2022-09-14
Supplement: s1 [file s1]

**Table S1.** Immunosuppressive agents used in the study group at the time of the blod sample collection.

| Medications           | lcSSc, n (%) | dcSSc, n (%) | SSc, n (%) |
|-----------------------|--------------|--------------|------------|
| Methotrexate          | 7 (25,93)    | 4 (23,53)    | 11 (24)    |
| Mycophenolate mofetil | 2 (7,41)     | 5 (27,78)    | 7 (16)     |
| Azathioprine          | 2 (7,41)     | 2 (11,76)    | 4 (9)      |
| Glucocorticosteroids  | 4 (14,81)    | 2 (11,76)    | 6 (13)     |

**Table S2.** Different methotrexate dosages in a study group at the time of sample collection.

| Methotrexate Dose<br>(mg/week) | Number of Patients-<br>n (%) |
|--------------------------------|------------------------------|
| 10                             | 1 (9,09)                     |
| 12,5                           | 1 (9,09)                     |
| 15                             | 6 (54,55)                    |
| 20                             | 3 (27,27)                    |

**Table S3.** Correlation between microRNA expression in healthy subjects and patients with SSc.

| Healthy Subjects            |         |          |          |          | SSc Patients                |         |          |          |          |
|-----------------------------|---------|----------|----------|----------|-----------------------------|---------|----------|----------|----------|
| <i>microRNA interaction</i> |         | <i>r</i> | <i>p</i> | <i>n</i> | <i>microRNA interaction</i> |         | <i>r</i> | <i>p</i> | <i>n</i> |
| miR145                      | miR155  | 0.879    | 0.000    | 57       | miR126                      | miR145  | 0.755    | 0.000    | 45       |
| miR132                      | miR143  | 0.712    | 0.000    | 57       | miR126                      | miR143  | 0.655    | 0.000    | 45       |
| miR132                      | miR155  | 0.697    | 0.000    | 57       | miR126                      | miR132  | 0.647    | 0.000    | 45       |
| miR132                      | miR145  | 0.664    | 0.000    | 57       | miR145                      | miR155  | 0.637    | 0.000    | 45       |
| miR126                      | miR181a | 0.658    | 0.000    | 57       | miR132                      | miR29a  | 0.635    | 0.000    | 45       |
| miR126                      | miR155  | 0.641    | 0.000    | 57       | miR132                      | miR145  | 0.615    | 0.000    | 45       |
| miR126                      | miR145  | 0.625    | 0.000    | 57       | miR145                      | miR181a | 0.614    | 0.000    | 33       |
| miR126                      | miR29a  | 0.619    | 0.000    | 57       | miR132                      | miR181a | 0.589    | 0.000    | 33       |
| miR143                      | miR155  | 0.618    | 0.000    | 57       | miR143                      | miR145  | 0.570    | 0.000    | 45       |
| miR143                      | miR145  | 0.575    | 0.000    | 57       | miR181a                     | miR29a  | 0.566    | 0.001    | 33       |
| miR126                      | miR132  | 0.520    | 0.000    | 57       | miR155                      | miR181a | 0.534    | 0.001    | 33       |
| miR155                      | miR181a | 0.511    | 0.000    | 57       | miR126                      | miR29a  | 0.506    | 0.000    | 45       |
| miR155                      | miR29a  | 0.497    | 0.000    | 57       | miR145                      | miR29a  | 0.464    | 0.001    | 45       |
| miR145                      | miR181a | 0.471    | 0.000    | 57       | miR126                      | miR155  | 0.456    | 0.002    | 45       |
| miR181a                     | miR29a  | 0.447    | 0.000    | 57       | miR126                      | miR181a | 0.443    | 0.010    | 33       |
| miR145                      | miR29a  | 0.438    | 0.001    | 57       | miR132                      | miR143  | 0.433    | 0.003    | 45       |
| miR143                      | miR181a | 0.405    | 0.002    | 57       | miR143                      | miR29a  | 0.411    | 0.005    | 45       |
| miR126                      | miR143  | 0.399    | 0.002    | 57       | miR143                      | miR155  | 0.383    | 0.009    | 45       |
| miR132                      | miR181a | 0.397    | 0.002    | 57       | miR143                      | miR181a | 0.342    | 0.051    | 33       |
| miR143                      | miR29a  | 0.356    | 0.007    | 57       | miR155                      | miR29a  | 0.281    | 0.062    | 45       |
| miR132                      | miR29a  | 0.301    | 0.023    | 57       | miR132                      | miR155  | 0.263    | 0.081    | 45       |

\* Spearman correlation
